# Supplementary material for: Synthesis and properties of five ring fused aromatic compounds based on S,S-dioxide benzothiophene
Source: Royal Society of Chemistry journal article supplement (doi:10.1039/c7nj04306f), 2018-01-01
Supplement: c7nj04306f1.pdf [file c7nj04306f1.pdf]

# Synthesis and Properties of Five Ring Fused Aromatic Compounds Based *S,S*-Dioxide Benzothiophene

Yuhao Zhang,<sup>1</sup> Feng Peng,<sup>1</sup> Ruifeng He\*,<sup>1,2</sup> Lei Ying,<sup>1</sup> Wei Yang\*,<sup>1</sup> Yong Cao<sup>1</sup>

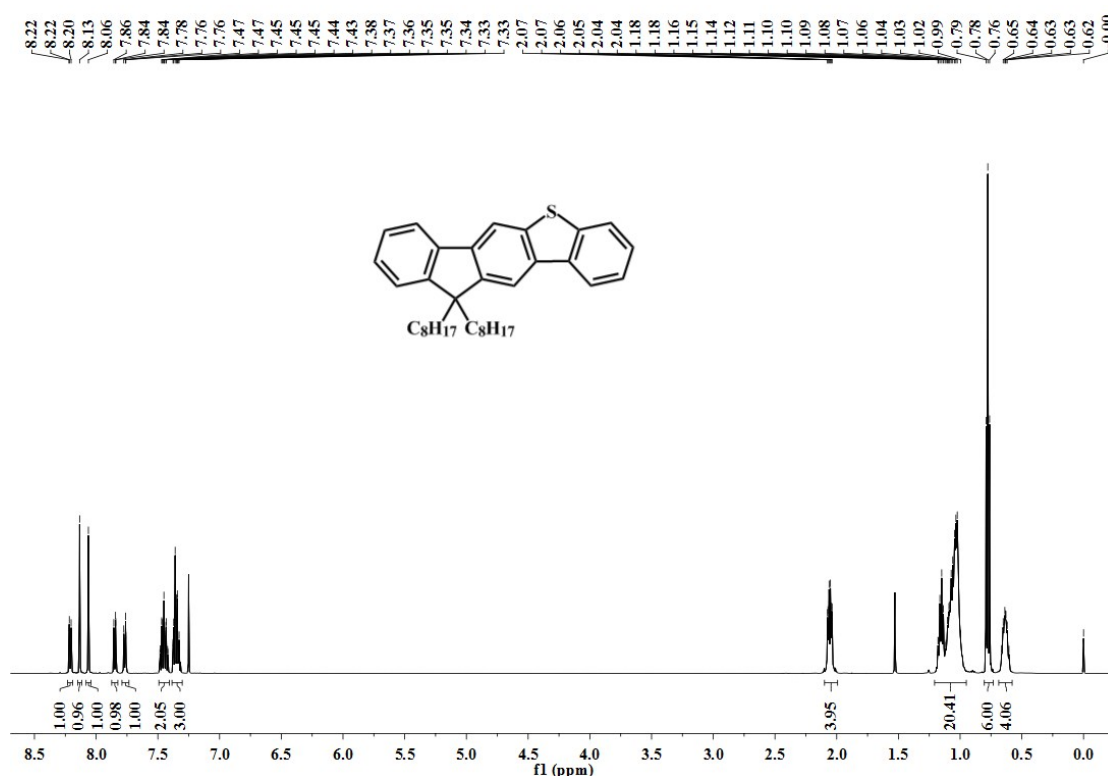

Figure S1. <sup>1</sup>H NMR spectrum of BTF in *d*-chloroform

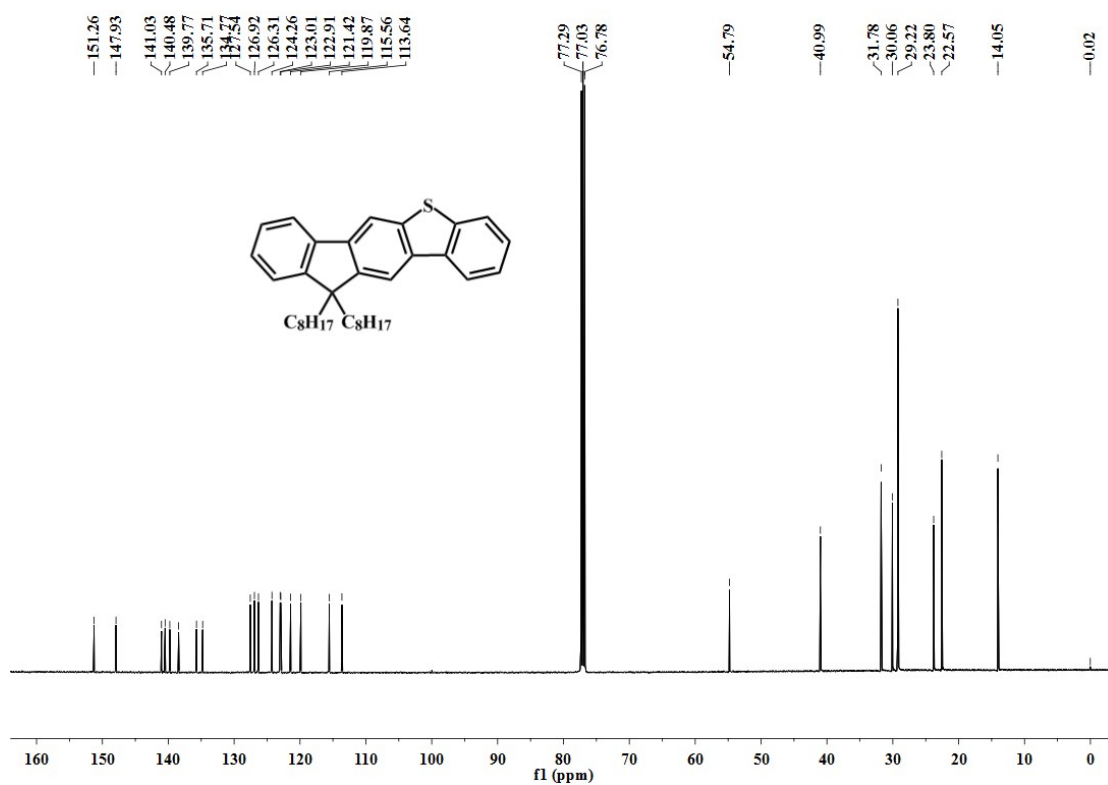

**Figure S2.**  $^{13}\text{C}$  NMR spectrum of **BTF** in *d*-chloroform

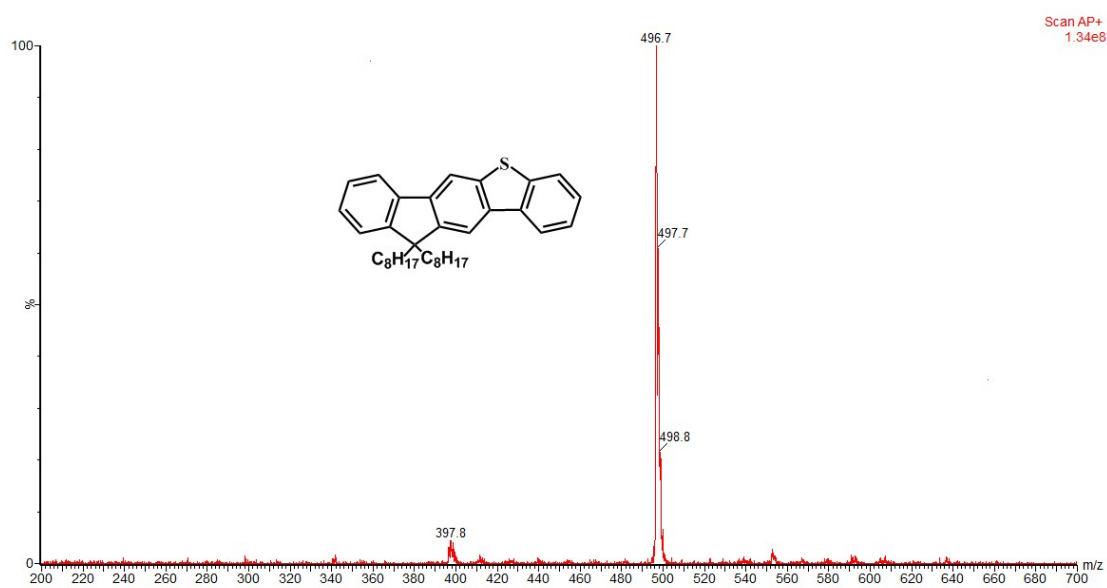

**Figure S3.** Mass spectrum of **BTF**

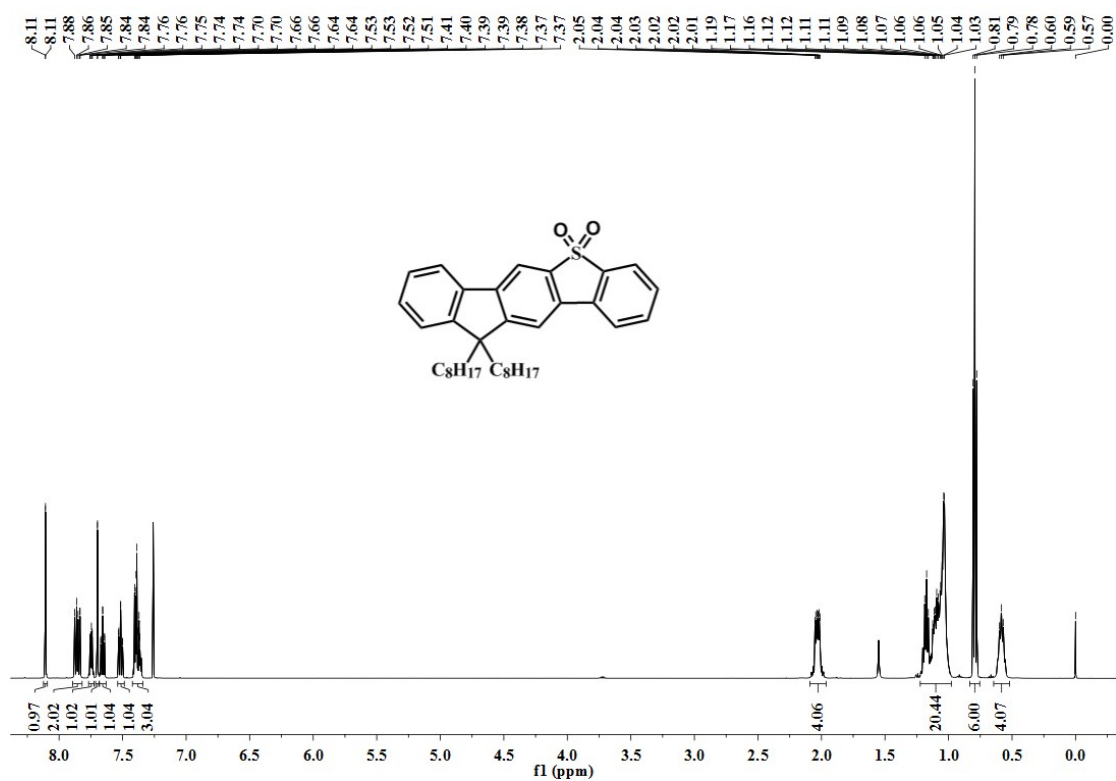

**Figure S4.** <sup>1</sup>H NMR spectrum of **BTOF** in *d*-chloroform

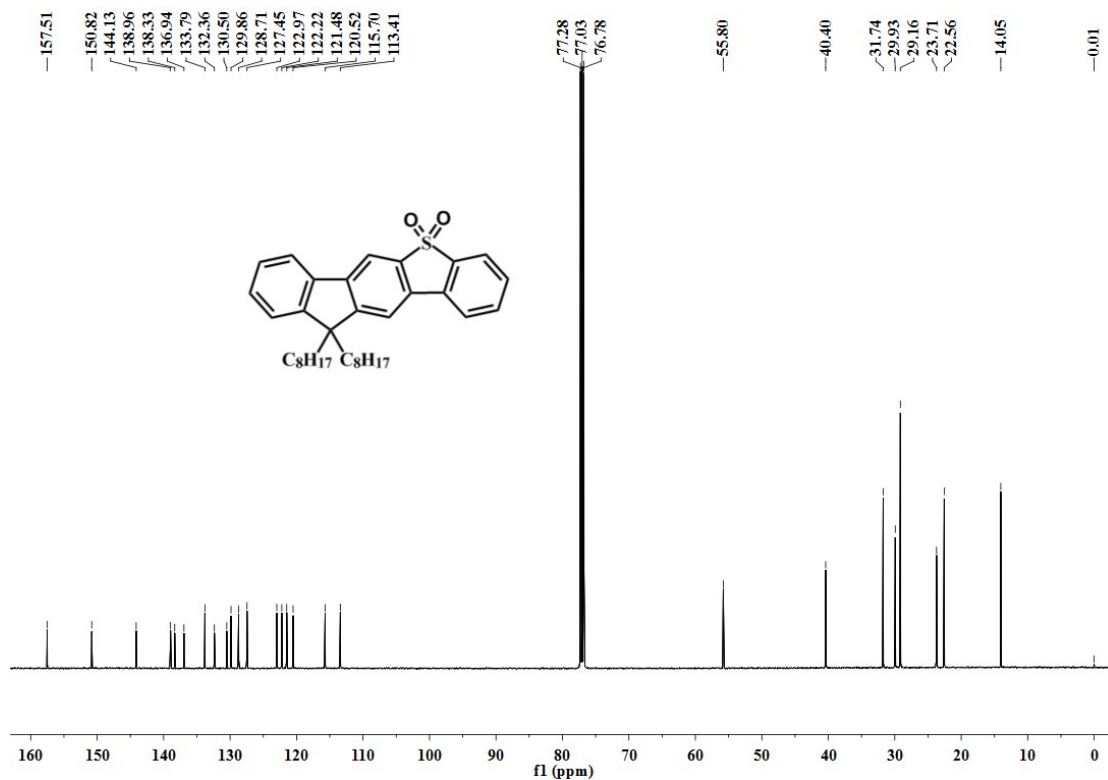

**Figure S5.** <sup>13</sup>C NMR spectrum of **BTOF** in *d*-chloroform

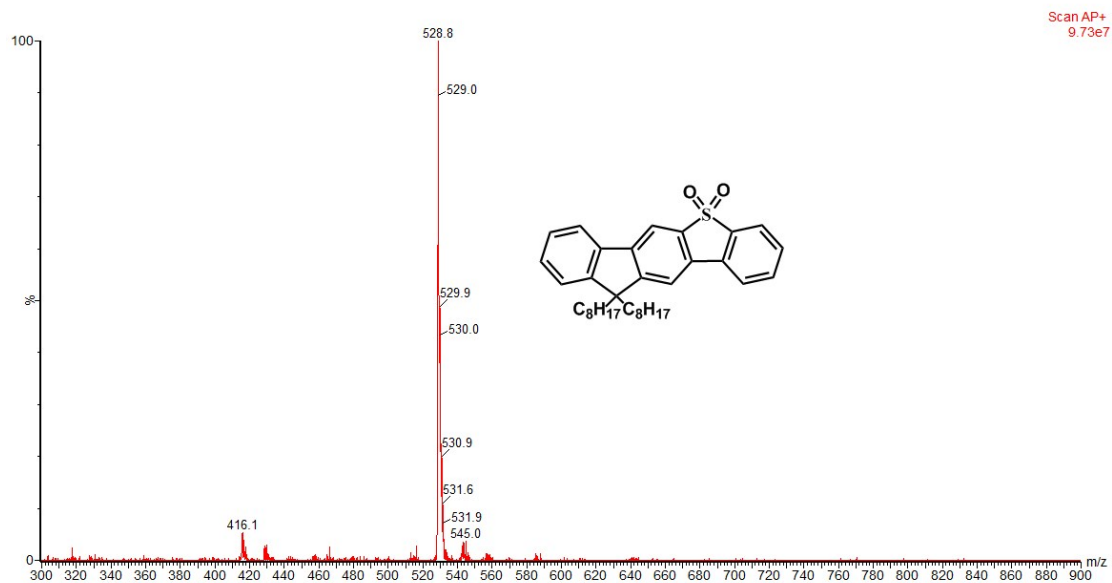

Figure S6. Mass spectrum of BTOF

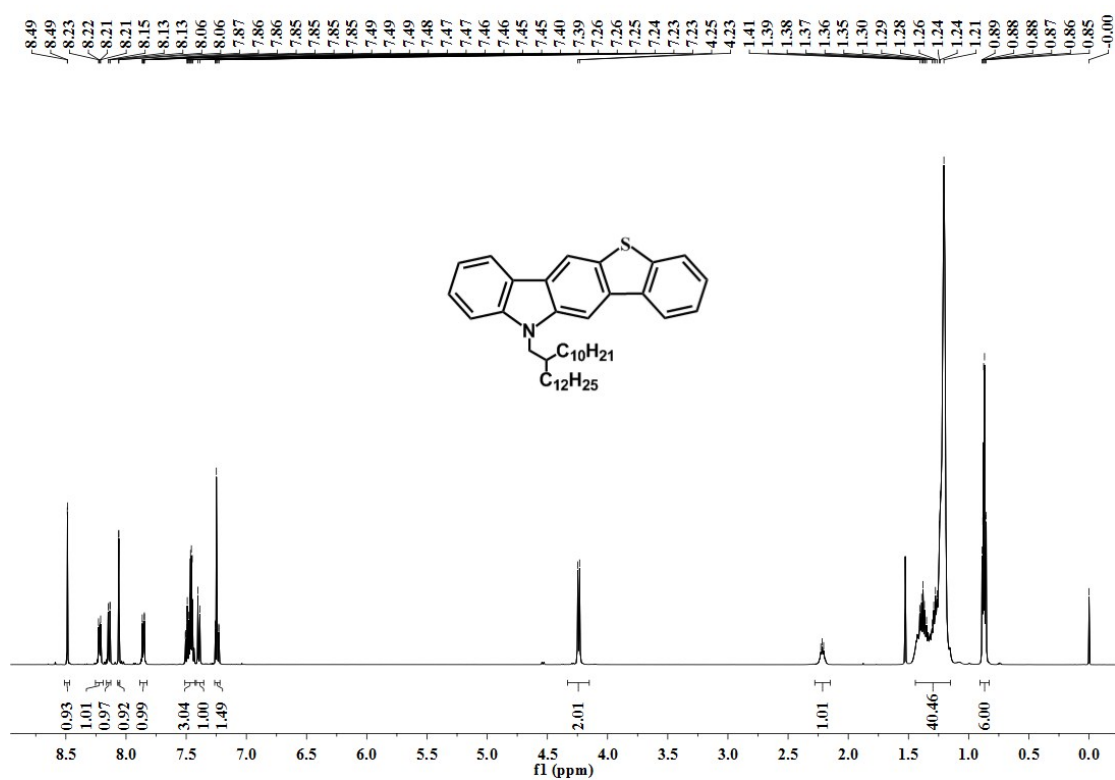

Figure S7.  $^1\text{H}$  NMR spectrum of BTCz in *d*-chloroform

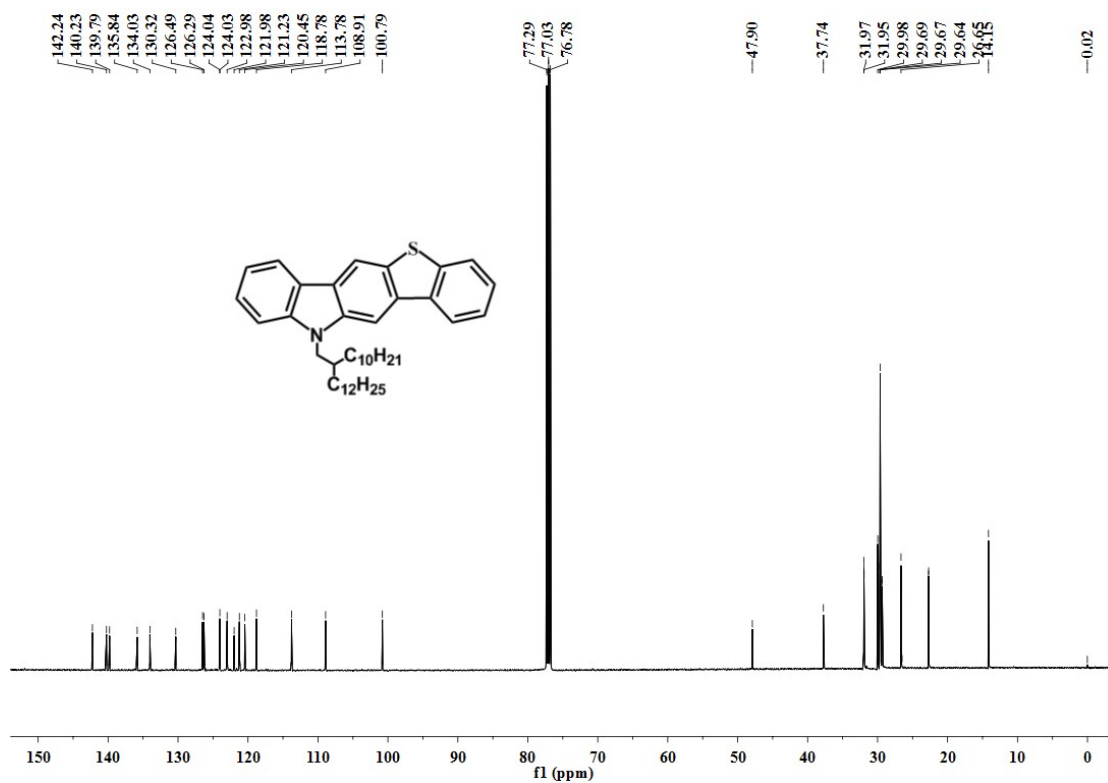

**Figure S8.** <sup>13</sup>C NMR spectrum of **BTCz** in *d*-chloroform

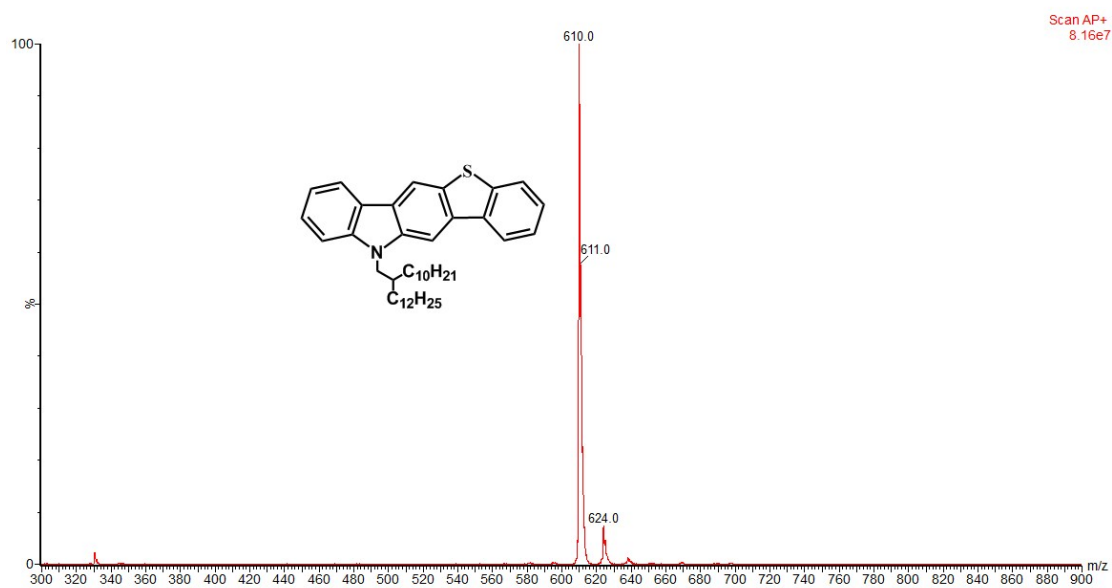

**Figure S9.** Mass spectrum of **BTCz**

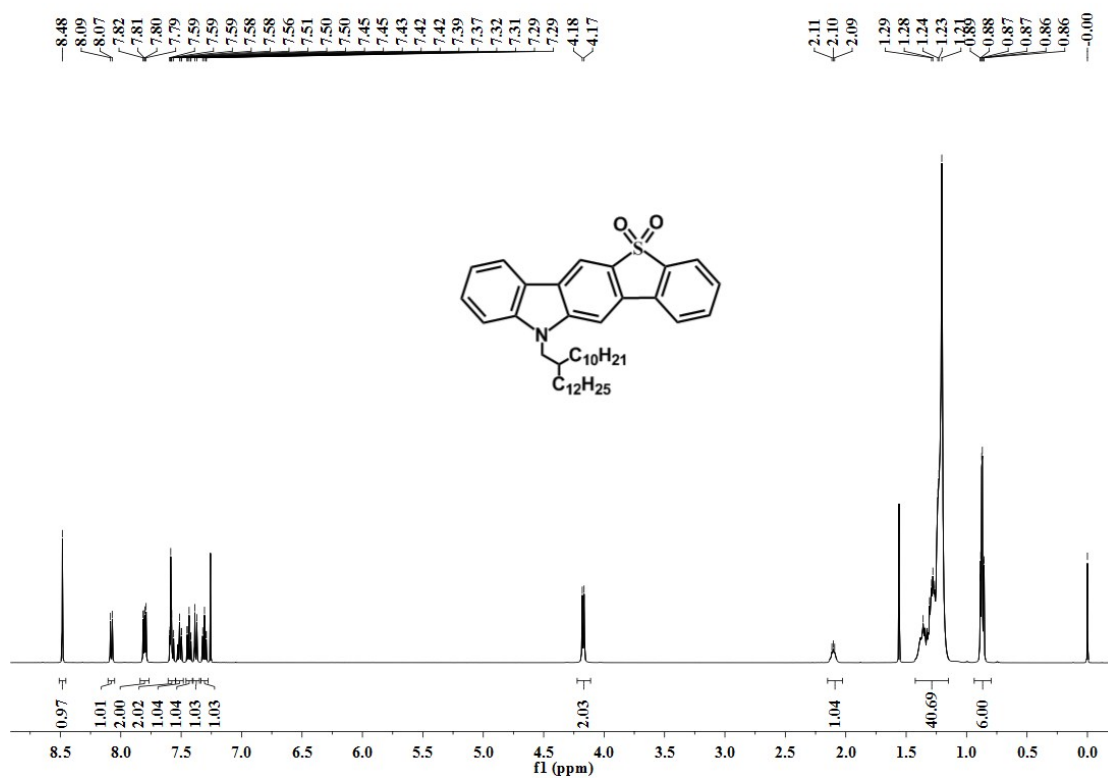

**Figure S10.** <sup>1</sup>H NMR spectrum of **BTOCz** in *d*-chloroform

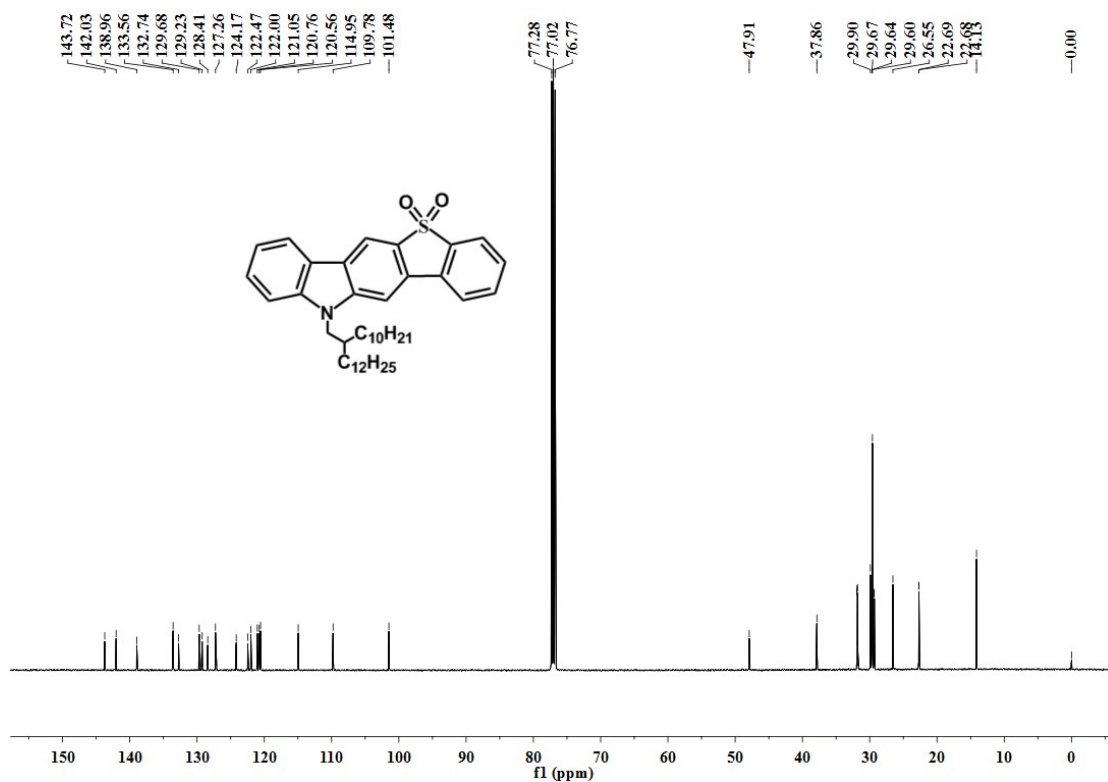

**Figure S11.** <sup>13</sup>C NMR spectrum of **BTOCz** in *d*-chloroform

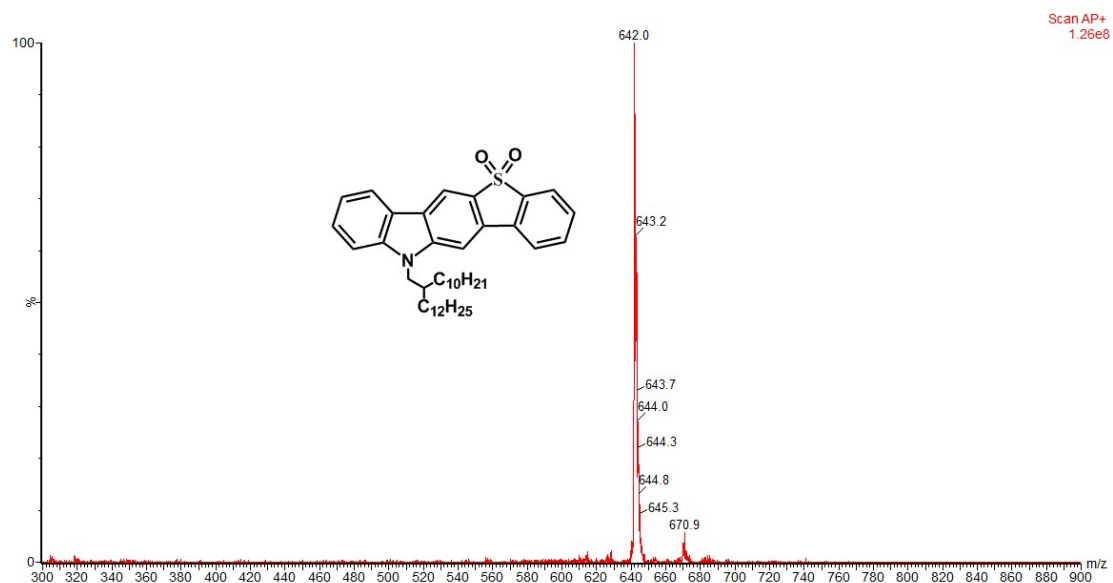

**Figure S12.** Mass spectrum of BTOCz
